# Supplementary material for: Robust and predictive 3D-QSAR models for predicting the activities of novel oxadiazole derivatives as multifunctional anti-Alzheimer agents
Source: PubMed Central journal article supplement — RSC Adv. 2024 Sep 23;14(41):30230–44. doi: 10.1039/d4ra05342g (PMC11418590; doi:10.1039/d4ra05342g), 2024-09-23
Supplement: RA-014-D4RA05342G-s001.pdf [file RA-014-D4RA05342G-s001.pdf]

**Robust and predictive 3D-QSAR models for predicting the activities of novel oxadiazole derivatives as multifunctional anti-Alzheimer agents**

**Yekai Sun<sup>a#</sup>, Zirou Zhang<sup>a#</sup>, Menghao Wen<sup>a</sup>, Fangfang Wang<sup>a\*</sup>, Xiuling Li<sup>a\*</sup>, Wei Yang<sup>b,c,d\*</sup> Bo Zhou<sup>e</sup>**

<sup>a</sup> School of Life Science, Linyi University, Linyi, 276000, China;

<sup>b</sup> National Clinical Research Center for Infectious Diseases, Shenzhen Third People's Hospital, 518112, Shenzhen, China;

<sup>c</sup> Shenzhen Clinical Research Center for Tuberculosis, Shenzhen, People's Republic of China;

<sup>d</sup> Warshel Institute for Computational Biology, School of Science and Engineering, The Chinese University of Hong Kong, 518172, Shenzhen, China;

<sup>e</sup> State Key Laboratory of Functions and Applications of Medicinal Plants, College of Basic Medical, Guizhou Medical University, Guizhou, 550004, China.

\* Corresponding author

E-mail: yu100288@163.com

# These authors contributed equally to this work.

Table S1. Summary of template ligand-based QSAR results.

|                                | CoMFA  | CoMSIA |        |        |        |        |        |        |        |
|--------------------------------|--------|--------|--------|--------|--------|--------|--------|--------|--------|
|                                | SE     | S      | E      | H      | D      | A      | SE     | SH     | SD     |
| R <sup>2</sup> <sub>cv</sub>   | 0.692  | 0.685  | 0.680  | 0.694  | 0.689  | 0.678  | 0.686  | 0.695  | 0.692  |
| R <sup>2</sup> <sub>ncv</sub>  | 0.818  | 0.708  | 0.705  | 0.712  | 0.708  | 0.702  | 0.710  | 0.717  | 0.714  |
| SEE                            | 0.260  | 0.265  | 0.267  | 0.263  | 0.265  | 0.268  | 0.264  | 0.261  | 0.263  |
| F                              | 21.670 | 20.570 | 20.290 | 20.996 | 20.639 | 20.050 | 20.762 | 21.519 | 21.179 |
| R <sup>2</sup> <sub>pred</sub> | 0.6885 | 0.6933 | 0.6072 | 0.6732 | 0.6034 | 0.6129 | 0.6829 | 0.6567 | 0.6835 |
| SEP                            | 0.313  | 0.316  | 0.318  | 0.313  | 0.315  | 0.319  | 0.316  | 0.312  | 0.313  |
| N <sub>C</sub>                 | 2      | 2      | 2      | 2      | 2      | 2      | 2      | 2      | 2      |
| <b>Field contribution</b>      |        |        |        |        |        |        |        |        |        |
| S                              | 0.078  | 0.033  | -      | -      | -      | -      | 0.032  | 0.031  | 0.032  |
| E                              | 0.006  | -      | 0.017  | -      | -      | -      | 0.017  | -      | -      |
| H                              | -      | -      | -      | 0.046  | -      | -      | -      | 0.044  | -      |
| D                              | -      | -      | -      | -      | 0.022  | -      | -      | -      | 0.021  |
| A                              | -      | -      | -      | -      | -      | 0.019  | -      | -      | -      |
| RDF060p                        | 0.303  | 0.333  | 0.345  | 0.325  | 0.338  | 0.346  | 0.324  | 0.304  | 0.316  |
| Mor20e                         | 0.277  | 0.296  | 0.303  | 0.289  | 0.297  | 0.304  | 0.291  | 0.279  | 0.286  |
| Mor28m                         | 0.336  | 0.338  | 0.334  | 0.340  | 0.342  | 0.331  | 0.336  | 0.342  | 0.344  |
| <b>CoMSIA</b>                  |        |        |        |        |        |        |        |        |        |
|                                | SA     | EH     | ED     | EA     | HD     | HA     | DA     | SEH    | SED    |

|                                |        |        |        |        |        |        |        |        |        |
|--------------------------------|--------|--------|--------|--------|--------|--------|--------|--------|--------|
| R <sup>2</sup> <sub>cv</sub>   | 0.686  | 0.694  | 0.690  | 0.681  | 0.699  | 0.625  | 0.690  | 0.692  | 0.691  |
| R <sup>2</sup> <sub>ncv</sub>  | 0.708  | 0.714  | 0.710  | 0.705  | 0.718  | 0.967  | 0.708  | 0.719  | 0.715  |
| SEE                            | 0.265  | 0.263  | 0.264  | 0.267  | 0.261  | 0.107  | 0.265  | 0.260  | 0.262  |
| F                              | 20.574 | 21.192 | 20.853 | 20.268 | 21.659 | 49.597 | 20.656 | 21.700 | 21.371 |
| R <sup>2</sup> <sub>pred</sub> | 0.6889 | 0.6649 | 0.6937 | 0.6012 | 0.6655 | 0.4361 | 0.6988 | 0.6490 | 0.6742 |
| SEP                            | 0.316  | 0.313  | 0.314  | 0.318  | 0.311  | 0.357  | 0.314  | 0.313  | 0.314  |
| N <sub>C</sub>                 | 2      | 2      | 2      | 2      | 2      | 7      | 2      | 2      | 2      |
| <b>Field contribution</b>      |        |        |        |        |        |        |        |        |        |
| S                              | 0.033  | -      | -      | -      | -      | -      | -      | 0.031  | 0.032  |
| E                              | -      | 0.017  | 0.017  | 0.017  | -      | -      | -      | 0.016  | 0.016  |
| H                              | -      | 0.045  | -      | -      | 0.045  | 0.545  | -      | 0.043  | -      |
| D                              | -      | -      | 0.022  | -      | 0.021  | -      | 0.022  | -      | 0.021  |
| A                              | 0.018  | -      | -      | 0.019  | -      | 0.068  | 0.019  | -      | -      |
| RDF060p                        | 0.324  | 0.315  | 0.328  | 0.336  | 0.308  | 0.125  | 0.329  | 0.295  | 0.307  |
| Mor20e                         | 0.291  | 0.285  | 0.293  | 0.298  | 0.281  | 0.127  | 0.293  | 0.276  | 0.283  |
| Mor28m                         | 0.334  | 0.338  | 0.340  | 0.330  | 0.345  | 0.135  | 0.338  | 0.340  | 0.341  |
| <b>CoMSIA</b>                  |        |        |        |        |        |        |        |        |        |
|                                | SEA    | SHD    | SHA    | SDA    | EHD    | EHA    | EDA    | HDA    | SEHD   |
| R <sup>2</sup> <sub>cv</sub>   | 0.686  | 0.694  | 0.693  | 0.691  | 0.696  | 0.694  | 0.690  | 0.616  | 0.690  |
| R <sup>2</sup> <sub>ncv</sub>  | 0.710  | 0.723  | 0.718  | 0.714  | 0.820  | 0.714  | 0.711  | 0.966  | 0.725  |
| SEE                            | 0.264  | 0.258  | 0.261  | 0.262  | 0.260  | 0.262  | 0.264  | 0.108  | 0.257  |
| F                              | 20.777 | 22.228 | 21.600 | 21.239 | 21.852 | 21.229 | 20.877 | 48.597 | 22.403 |
| R <sup>2</sup> <sub>pred</sub> | 0.6791 | 0.6523 | 0.6545 | 0.6799 | 0.6887 | 0.6612 | 0.6891 | 0.4005 | 0.6460 |
| SEP                            | 0.316  | 0.313  | 0.313  | 0.314  | 0.312  | 0.313  | 0.314  | 0.362  | 0.314  |
| N <sub>C</sub>                 | 2      | 2      | 2      | 2      | 2      | 2      | 2      | 7      | 2      |
| <b>Field contribution</b>      |        |        |        |        |        |        |        |        |        |
| S                              | 0.032  | 0.031  | 0.031  | 0.032  | -      | -      | -      | -      | 0.030  |
| E                              | 0.016  | -      | -      | -      | 0.016  | 0.016  | 0.017  | -      | 0.015  |
| H                              | -      | 0.042  | 0.043  | -      | 0.044  | 0.044  | -      | 0.492  | 0.041  |
| D                              | -      | 0.020  | -      | 0.021  | 0.020  | -      | 0.021  | 0.083  | 0.019  |
| A                              | 0.018  | -      | 0.017  | 0.018  | -      | 0.018  | 0.018  | 0.084  | -      |
| RDF060p                        | 0.315  | 0.289  | 0.295  | 0.307  | 0.299  | 0.306  | 0.319  | 0.101  | 0.280  |
| Mor20e                         | 0.287  | 0.273  | 0.276  | 0.283  | 0.278  | 0.281  | 0.288  | 0.131  | 0.271  |
| Mor28m                         | 0.332  | 0.345  | 0.338  | 0.339  | 0.343  | 0.334  | 0.336  | 0.110  | 0.343  |
| <b>CoMSIA</b>                  |        |        |        |        |        |        |        |        |        |
|                                | SEHA   | SEDA   | SHDA   | EHDA   | SEHDA  |        |        |        |        |
| R <sup>2</sup> <sub>cv</sub>   | 0.690  | 0.689  | 0.692  | 0.695  | 0.688  |        |        |        |        |
| R <sup>2</sup> <sub>ncv</sub>  | 0.719  | 0.716  | 0.725  | 0.721  | 0.726  |        |        |        |        |
| SEE                            | 0.260  | 0.261  | 0.258  | 0.259  | 0.257  |        |        |        |        |
| F                              | 21.794 | 21.442 | 22.367 | 21.949 | 22.553 |        |        |        |        |
| R <sup>2</sup> <sub>pred</sub> | 0.6475 | 0.6724 | 0.6526 | 0.6571 | 0.6470 |        |        |        |        |
| SEP                            | 0.314  | 0.314  | 0.313  | 0.312  | 0.315  |        |        |        |        |
| N <sub>C</sub>                 | 2      | 2      | 2      | 2      | 2      |        |        |        |        |

| Field contribution |       |       |       |       |       |
|--------------------|-------|-------|-------|-------|-------|
| S                  | 0.030 | 0.031 | 0.030 | -     | 0.029 |
| E                  | 0.016 | 0.016 | -     | 0.016 | 0.015 |
| H                  | 0.042 | -     | 0.042 | 0.043 | 0.041 |
| D                  | -     | 0.020 | 0.020 | 0.020 | 0.019 |
| A                  | 0.017 | 0.017 | 0.017 | 0.017 | 0.017 |
| RDF060p            | 0.286 | 0.298 | 0.280 | 0.291 | 0.273 |
| Mor20e             | 0.237 | 0.279 | 0.270 | 0.275 | 0.269 |
| Mor28m             | 0.336 | 0.337 | 0.341 | 0.338 | 0.338 |

Table S2. Summary of receptor-based QSAR results.

|                    | CoMFA  | CoMSIA |        |        |        |        |        |        |        |
|--------------------|--------|--------|--------|--------|--------|--------|--------|--------|--------|
|                    | SE     | S      | E      | H      | D      | A      | SE     | SH     | SD     |
| $R^2_{cv}$         | 0.604  | 0.604  | 0.599  | 0.590  | 0.593  | 0.586  | 0.597  | 0.592  | 0.593  |
| $R^2_{ncv}$        | 0.776  | 0.735  | 0.757  | 0.732  | 0.759  | 0.741  | 0.789  | 0.766  | 0.792  |
| SEE                | 0.232  | 0.252  | 0.242  | 0.254  | 0.241  | 0.250  | 0.226  | 0.237  | 0.224  |
| F                  | 29.421 | 23.617 | 26.423 | 23.202 | 26.772 | 24.294 | 31.725 | 27.815 | 32.285 |
| $R^2_{pred}$       | 0.6293 | 0.6109 | 0.6652 | 0.6100 | 0.5996 | 0.6424 | 0.6773 | 0.6127 | 0.6069 |
| SEP                | 0.309  | 0.309  | 0.311  | 0.314  | 0.313  | 0.316  | 0.312  | 0.313  | 0.313  |
| $N_C$              | 2      | 2      | 2      | 2      | 2      | 2      | 2      | 2      | 2      |
| Field contribution |        |        |        |        |        |        |        |        |        |
| S                  | 0.090  | 0.078  | -      | -      | -      | -      | 0.076  | 0.079  | 0.078  |
| E                  | 0.132  | -      | 0.163  | -      | -      | -      | 0.157  | -      | -      |
| H                  | -      | -      | -      | 0.096  | -      | -      | -      | 0.096  | -      |
| D                  | -      | -      | -      | -      | 0.157  | -      | -      | -      | 0.150  |
| A                  | -      | -      | -      | -      | -      | 0.115  | -      | -      | -      |
| RDF060p            | 0.251  | 0.317  | 0.267  | 0.306  | 0.279  | 0.295  | 0.238  | 0.271  | 0.251  |
| Mor20e             | 0.230  | 0.270  | 0.254  | 0.272  | 0.243  | 0.265  | 0.231  | 0.243  | 0.221  |
| Mor28m             | 0.297  | 0.336  | 0.317  | 0.326  | 0.321  | 0.325  | 0.298  | 0.312  | 0.300  |
| CoMSIA             |        |        |        |        |        |        |        |        |        |
|                    | SA     | EH     | ED     | EA     | HD     | HA     | DA     | SEH    | SED    |
| $R^2_{cv}$         | 0.588  | 0.576  | 0.579  | 0.573  | 0.574  | 0.569  | 0.569  | 0.571  | 0.575  |
| $R^2_{ncv}$        | 0.774  | 0.787  | 0.812  | 0.794  | 0.792  | 0.773  | 0.797  | 0.815  | 0.835  |
| SEE                | 0.233  | 0.226  | 0.213  | 0.223  | 0.224  | 0.234  | 0.221  | 0.211  | 0.199  |
| F                  | 29.133 | 31.452 | 36.613 | 32.792 | 32.307 | 28.973 | 33.271 | 37.457 | 43.057 |
| $R^2_{pred}$       | 0.6520 | 0.6817 | 0.6818 | 0.7253 | 0.6052 | 0.6552 | 0.6524 | 0.6944 | 0.6936 |
| SEP                | 0.315  | 0.319  | 0.318  | 0.321  | 0.320  | 0.322  | 0.322  | 0.321  | 0.320  |
| $N_C$              | 2      | 2      | 2      | 2      | 2      | 2      | 2      | 2      | 2      |
| Field contribution |        |        |        |        |        |        |        |        |        |
| S                  | 0.077  | -      | -      | -      | -      | -      | -      | 0.073  | 0.069  |
| E                  | -      | 0.159  | 0.152  | 0.151  | -      | -      | -      | 0.148  | 0.140  |

|                                |        |        |        |        |        |        |        |        |        |
|--------------------------------|--------|--------|--------|--------|--------|--------|--------|--------|--------|
| H                              | -      | 0.092  | -      | -      | 0.095  | 0.094  | -      | 0.086  | -      |
| D                              | -      | -      | 0.144  | -      | 0.153  | -      | 0.146  | -      | 0.133  |
| A                              | 0.113  | -      | -      | 0.110  | -      | 0.116  | 0.112  | -      | -      |
| RDF060p                        | 0.263  | 0.224  | 0.210  | 0.221  | 0.237  | 0.249  | 0.233  | 0.205  | 0.196  |
| Mor20e                         | 0.239  | 0.236  | 0.219  | 0.235  | 0.224  | 0.242  | 0.224  | 0.221  | 0.208  |
| Mor28m                         | 0.308  | 0.288  | 0.275  | 0.283  | 0.291  | 0.298  | 0.285  | 0.268  | 0.255  |
| <b>CoMSIA</b>                  |        |        |        |        |        |        |        |        |        |
|                                | SEA    | SHD    | SHA    | SDA    | EHD    | EHA    | EDA    | HDA    | SEHD   |
| R <sup>2</sup> <sub>cv</sub>   | 0.568  | 0.571  | 0.565  | 0.567  | 0.555  | 0.547  | 0.551  | 0.547  | 0.552  |
| R <sup>2</sup> <sub>ncv</sub>  | 0.820  | 0.819  | 0.803  | 0.823  | 0.835  | 0.819  | 0.836  | 0.823  | 0.853  |
| SEE                            | 0.208  | 0.209  | 0.218  | 0.207  | 0.199  | 0.209  | 0.199  | 0.206  | 0.188  |
| F                              | 38.733 | 38.551 | 34.643 | 39.439 | 43.030 | 38.435 | 43.236 | 39.532 | 49.419 |
| R <sup>2</sup> <sub>pred</sub> | 0.7356 | 0.6165 | 0.6658 | 0.6621 | 0.6975 | 0.7419 | 0.7389 | 0.6640 | 0.7008 |
| SEP                            | 0.323  | 0.321  | 0.324  | 0.323  | 0.327  | 0.330  | 0.329  | 0.330  | 0.329  |
| N <sub>C</sub>                 | 2      | 2      | 2      | 2      | 2      | 2      | 2      | 2      | 2      |
| <b>Field contribution</b>      |        |        |        |        |        |        |        |        |        |
| S                              | 0.069  | 0.074  | 0.074  | 0.070  | -      | -      | -      | -      | 0.063  |
| E                              | 0.140  | -      | -      | -      | 0.140  | 0.140  | 0.132  | -      | 0.128  |
| H                              | -      | 0.088  | 0.089  | -      | 0.081  | 0.082  | -      | 0.084  | 0.074  |
| D                              | -      | 0.142  | -      | 0.136  | 0.135  | -      | 0.126  | 0.136  | 0.1239 |
| A                              | 0.103  | -      | 0.110  | 0.104  | -      | 0.104  | 0.097  | 0.105  | -      |
| RDF060p                        | 0.204  | 0.218  | 0.226  | 0.215  | 0.186  | 0.194  | 0.188  | 0.204  | 0.178  |
| Mor20e                         | 0.221  | 0.209  | 0.224  | 0.210  | 0.214  | 0.227  | 0.216  | 0.216  | 0.206  |
| Mor28m                         | 0.263  | 0.269  | 0.277  | 0.265  | 0.245  | 0.253  | 0.241  | 0.254  | 0.228  |
| <b>CoMSIA</b>                  |        |        |        |        |        |        |        |        |        |
|                                | SEHA   | SEDA   | SHDA   | EHDA   | SEHDA  |        |        |        |        |
| R <sup>2</sup> <sub>cv</sub>   | 0.543  | 0.548  | 0.545  | 0.530  | 0.529  |        |        |        |        |
| R <sup>2</sup> <sub>ncv</sub>  | 0.840  | 0.853  | 0.844  | 0.851  | 0.864  |        |        |        |        |
| SEE                            | 0.197  | 0.188  | 0.194  | 0.190  | 0.181  |        |        |        |        |
| F                              | 44.479 | 49.381 | 45.841 | 48.474 | 54.208 |        |        |        |        |
| R <sup>2</sup> <sub>pred</sub> | 0.7429 | 0.7348 | 0.6669 | 0.7350 | 0.7250 |        |        |        |        |
| SEP                            | 0.332  | 0.330  | 0.331  | 0.336  | 0.337  |        |        |        |        |
| N <sub>C</sub>                 | 2      | 2      | 2      | 2      | 2      |        |        |        |        |
| <b>Field contribution</b>      |        |        |        |        |        |        |        |        |        |
| S                              | 0.064  | 0.060  | 0.065  | -      | 0.055  |        |        |        |        |
| E                              | 0.129  | 0.121  | -      | 0.119  | 0.110  |        |        |        |        |
| H                              | 0.075  | -      | 0.077  | 0.069  | 0.064  |        |        |        |        |
| D                              | -      | 0.116  | 0.125  | 0.116  | 0.107  |        |        |        |        |
| A                              | 0.096  | 0.089  | 0.096  | 0.089  | 0.082  |        |        |        |        |
| RDF060p                        | 0.184  | 0.180  | 0.193  | 0.175  | 0.170  |        |        |        |        |
| Mor20e                         | 0.217  | 0.208  | 0.206  | 0.214  | 0.208  |        |        |        |        |
| Mor28m                         | 0.236  | 0.226  | 0.236  | 0.217  | 0.204  |        |        |        |        |

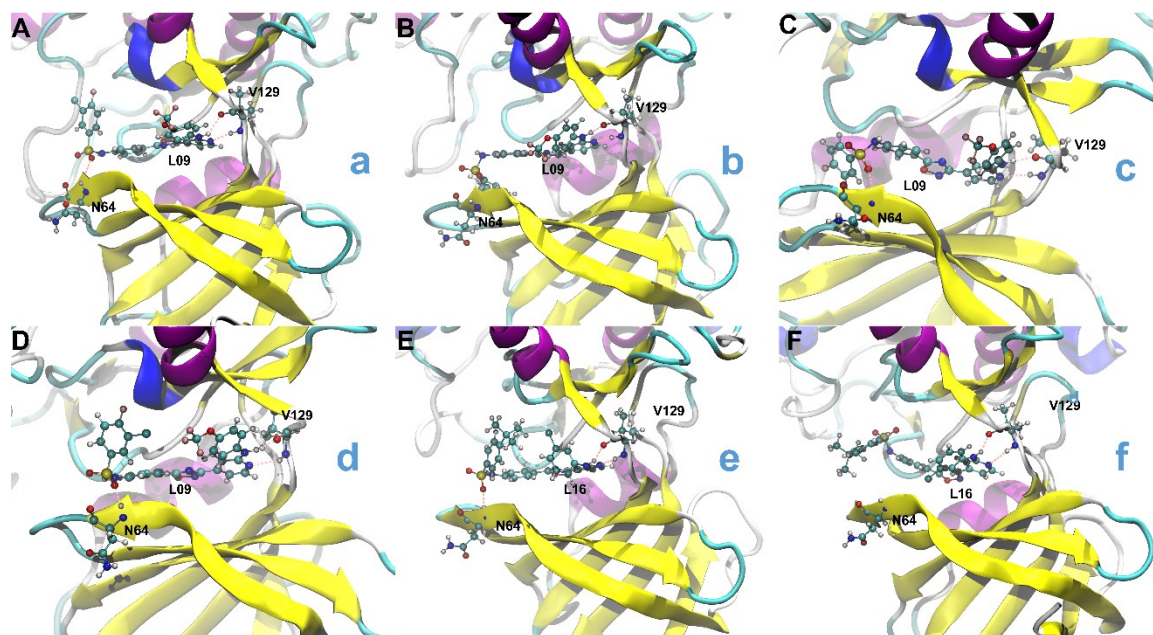

**Fig. S1 Representative structures of metastable states.** The representative structures of each metastable state during the MD simulations are shown. Panels A-F correspond to states a to f. The protein is depicted using the New Cartoon representation, while L09, L16, and key residues are shown using balls and sticks.

**Table S3. Binding Affinity Calculations for L09 and L16.** The binding affinities for L09 and L16 with the receptor GSK3 $\beta$  were calculated using the GBSA and PBSA methods, respectively.

| Energy terms     | L09      |                   | L16      |                   |
|------------------|----------|-------------------|----------|-------------------|
| GBSA             |          |                   |          |                   |
| Energy Component | Average  | Std. Err. of Mean | Average  | Std. Err. of Mean |
| VDWAALS          | -53.2787 | 0.0713            | -51.5581 | 0.05              |
| EEL              | -25.3926 | 0.0653            | -21.7004 | 0.0898            |
| EGB              | 46.4078  | 0.0594            | 41.5526  | 0.0843            |
| ESURF            | -6.9815  | 0.0083            | -6.5051  | 0.0056            |
| DELTA G gas      | -78.6713 | 0.0949            | -73.2585 | 0.1025            |
| DELTA G solv     | 39.4263  | 0.0558            | 35.0476  | 0.0819            |
| DELTA TOTAL      | -39.2449 | 0.0626            | -38.2109 | 0.0503            |
| DELTA S total    | -26.5418 | 0.4784            | -24.7703 | 0.641             |
| Binding (GBSA)   | -12.7031 | 0.541             | -13.4406 | 0.6913            |
| PBSA             |          |                   |          |                   |
| Energy Component | Average  | Std. Err. of Mean | Average  | Std. Err. of Mean |
| VDWAALS          | -53.2787 | 0.0713            | -51.5581 | 0.05              |

|                |          |        |          |        |
|----------------|----------|--------|----------|--------|
| EEL            | -25.3926 | 0.0653 | -21.7004 | 0.0898 |
| EPB            | 50.3688  | 0.0741 | 46.5303  | 0.1001 |
| ENPOLAR        | -5.2896  | 0.0044 | -5.1255  | 0.0032 |
| EDISPER        | 0        | 0      | 0        | 0      |
| DELTA G gas    | -78.6713 | 0.0949 | -73.2585 | 0.1025 |
| DELTA G solv   | 45.0792  | 0.0716 | 41.4048  | 0.0987 |
| DELTA TOTAL    | -33.5921 | 0.0554 | -31.8537 | 0.0553 |
| DELTA S total  | -26.5418 | 0.4784 | -24.7703 | 0.641  |
| Binding (PBSA) | -7.0503  | 0.5338 | -7.0834  | 0.6963 |

**Table S4. H-bond occupancy during simulations.** The H-bond occupancy rates were calculated based on the sum of replicates in the two MD systems, respectively.

| GSK3 $\beta$ -L09 |          |           | GSK3 $\beta$ -L16 |          |           |
|-------------------|----------|-----------|-------------------|----------|-----------|
| donor             | acceptor | occupancy | donor             | acceptor | occupancy |
| L09               | Val129   | 41.80%    | L16               | Val129   | 20.73%    |
| Lys177            | L09      | 0.16%     | L16               | Asp194   | 5.87%     |
| Val129            | L09      | 3.88%     | Lys177            | L16      | 0.78%     |
| L09               | Asp194   | 0.24%     | Val129            | L16      | 4.31%     |
| Asn180            | L09      | 0.36%     | Asn180            | L16      | 10.23%    |
| Gln179            | L09      | 0.31%     | L16               | Asn180   | 0.15%     |
| Asn64             | L09      | 6.48%     | Gln179            | L16      | 0.07%     |
| L09               | Asn64    | 0.45%     | Arg214            | L16      | 0.04%     |
| Gly65             | L09      | 0.01%     | Lys85             | L16      | 0.12%     |
| Gln179            | L09      | 0.01%     | L16               | Gln179   | 0.69%     |
| Arg135            | L09      | 0.04%     | Ser66             | L16      | 0.11%     |
| Asn64             | L09      | 0.01%     | Asn64             | L16      | 3.25%     |
| Ser66             | L09      | 0.03%     | L16               | Asn64    | 0.69%     |
| Arg135            | L09      | 0.01%     | Tyr128            | L16      | 0.01%     |
| Lys60             | L09      | 0.01%     | L16               | Ser66    | 0.07%     |
| Tyr128            | L09      | 0.01%     | Ser66             | L16      | 0.01%     |
